# Supplementary material for: Physical Simulation of the Water-Conducting Fracture Zone of Weak Roofs in Shallow Seam Mining Based on a Self-Designed Hydromechanical Coupling Experiment System
Source: Hindawi journal article supplement (doi:10.1155/2020/2586349), 2020-02-26
Supplement: f1 [file 2586349.f1.docx]

Table S-1 Orthogonal test scheme

| Number | Sand-barite ratio（A） | Gypsum-Vaseline ratio（B） | Aggregate-binder ratio（C） | Silicone oil %（D） |
| --- | --- | --- | --- | --- |
| 1 | 3：1 | 3：1 | 5：1 | 0 |
| 2 | 3：1 | 2：1 | 6：1 | 2 |
| 3 | 3：1 | 1：1 | 7：1 | 4 |
| 4 | 3：1 | 1：2 | 8：1 | 6 |
| 5 | 3：1 | 1：3 | 9：1 | 8 |
| 6 | 2：1 | 3：1 | 6：1 | 4 |
| 7 | 2：1 | 2：1 | 7：1 | 6 |
| 8 | 2：1 | 1：1 | 8：1 | 8 |
| 9 | 2：1 | 1：2 | 9：1 | 0 |
| 10 | 2：1 | 1：3 | 5：1 | 2 |
| 11 | 1：1 | 3：1 | 7：1 | 8 |
| 12 | 1：1 | 2：1 | 8：1 | 0 |
| 13 | 1：1 | 1：1 | 9：1 | 2 |
| 14 | 1：1 | 1：2 | 5：1 | 4 |
| 15 | 1：1 | 1：3 | 6：1 | 6 |
| 16 | 1：2 | 3：1 | 8：1 | 2 |
| 17 | 1：2 | 2：1 | 9：1 | 4 |
| 18 | 1：2 | 1：1 | 5：1 | 6 |
| 19 | 1：2 | 1：2 | 6：1 | 8 |
| 20 | 1：2 | 1：3 | 7：1 | 0 |
| 21 | 1：3 | 3：1 | 9：1 | 6 |
| 22 | 1：3 | 2：1 | 5：1 | 8 |
| 23 | 1：3 | 1：1 | 6：1 | 0 |
| 24 | 1：3 | 1：2 | 7：1 | 2 |
| 25 | 1：3 | 1：3 | 8：1 | 4 |

Table S-2 Results of Orthogonal test

| Number | Expansion rate  (%) | Water absorption rate  (%) | Permeability  (10-7m/s) | Softening coefficient  (%) | Compressive strength  (kPa) | Tensile strength  (kPa) |
| --- | --- | --- | --- | --- | --- | --- |
| 1 | 6.7 | 8.32 | 7.82 | 64.1 | 92 | 17.6 |
| 2 | 6.8 | 6.96 | 6.54 | 69.0 | 84 | 18.2 |
| 3 | 6.2 | 6.80 | 4.23 | 75.0 | 68 | 15.4 |
| 4 | 5.8 | 5.12 | 1.62 | 80.0 | 46 | 10.5 |
| 5 | 5.0 | 4.48 | 0.32 | 86.4 | 22 | 5.4 |
| 6 | 10.4 | 8.64 | 6.19 | 66.7 | 96 | 18.3 |
| 7 | 9.9 | 8.32 | 5.32 | 73.3 | 86 | 19.4 |
| 8 | 8.4 | 6.88 | 3.52 | 80.6 | 62 | 12.4 |
| 9 | 10.8 | 6.01 | 4.10 | 62.3 | 61 | 12.1 |
| 10 | 7.4 | 5.52 | 0.46 | 84.8 | 33 | 8.9 |
| 11 | 12.3 | 9.28 | 5.85 | 80.0 | 85 | 17.9 |
| 12 | 12.8 | 11.84 | 6.80 | 52.9 | 105 | 20.1 |
| 13 | 11.7 | 10.48 | 4.09 | 59.3 | 86 | 18.2 |
| 14 | 10.4 | 7.44 | 0.75 | 78.8 | 52 | 15.8 |
| 15 | 9.3 | 5.60 | 0.08 | 88.9 | 27 | 8.7 |
| 16 | 18.6 | 13.68 | 6.32 | 52.9 | 87 | 17.2 |
| 17 | 17.4 | 12.64 | 5.08 | 57.3 | 75 | 15.4 |
| 18 | 15.5 | 11.92 | 2.73 | 78.7 | 61 | 14.6 |
| 19 | 14.8 | 9.92 | 0.62 | 85.0 | 40 | 12.1 |
| 20 | 15.2 | 12.24 | 0.89 | 71.4 | 42 | 12.8 |
| 21 | 18.9 | 12.96 | 5.96 | 58.9 | 73 | 16.8 |
| 22 | 17.4 | 11.84 | 3.63 | 73.3 | 60 | 17.2 |
| 23 | 17.2 | 14.40 | 3.79 | 58.3 | 72 | 19.3 |
| 24 | 16.7 | 12.64 | 1.56 | 65.1 | 43 | 11.8 |
| 25 | 15.9 | 10.72 | 0.31 | 75.0 | 28 | 8.9 |
